# Supplementary material
Source: PubMed Central journal article supplement (PMC10846678)
Supplement: ehp13423.smcontents.508.pdf [file ehp13423.smcontents.508.pdf]

**Note to readers with disabilities:** *EHP* strives to ensure that all journal content is accessible to all readers. However, some figures and Supplemental Material published in *EHP* articles may not conform to [508 standards](#) due to the complexity of the information being presented. If you need assistance accessing journal content, please contact [ehp508@niehs.nih.gov](mailto:ehp508@niehs.nih.gov). Our staff will work with you to assess and meet your accessibility needs within 3 working days.

### **Supplemental Material**

#### **Expanded Systematic Evidence Map for Hundreds of Per- and Polyfluoroalkyl Substances (PFAS) and Comprehensive PFAS Human Health Dashboard**

Avanti V. Shirke, Elizabeth G. Radke, Cynthia Lin, Robyn Blain, Nicole Vetter, Courtney Lemeris, Pamela Hartman, Heidi Hubbard, Michelle Angrish, Xabier Arzuaga, Johanna Congleton, Allen Davis, Laura V. Dishaw, Ryan Jones, Richard Judson, J. Phillip Kaiser, Andrew Kraft, Lucina Lizarraga, Pamela D. Noyes, Grace Patlewicz, Michele Taylor, Antony J. Williams, Kristina A. Thayer, and Laura M. Carlson

#### **Table of Contents**

##### **DeDuper**

##### **Distiller Literature Inventory SOP for Expanded PFAS Evidence Map (abbreviated)**

**Table S1.** PFAS under assessment by U.S. EPA that are not included in this systematic evidence map.

**Table S2.** Categorization for grouping endpoints under health outcomes.

**Table S3.** Types of study designs (human).

**Table S4.** HAWC Visual Inventory Table by Chemical.

##### **References**

**Additional File-** Excel Document
